# Supplementary material
Source: PubMed Central journal article supplement (PMC3426886)
Supplement: Supp_Fig1.pdf [file Supp_Fig1.pdf]

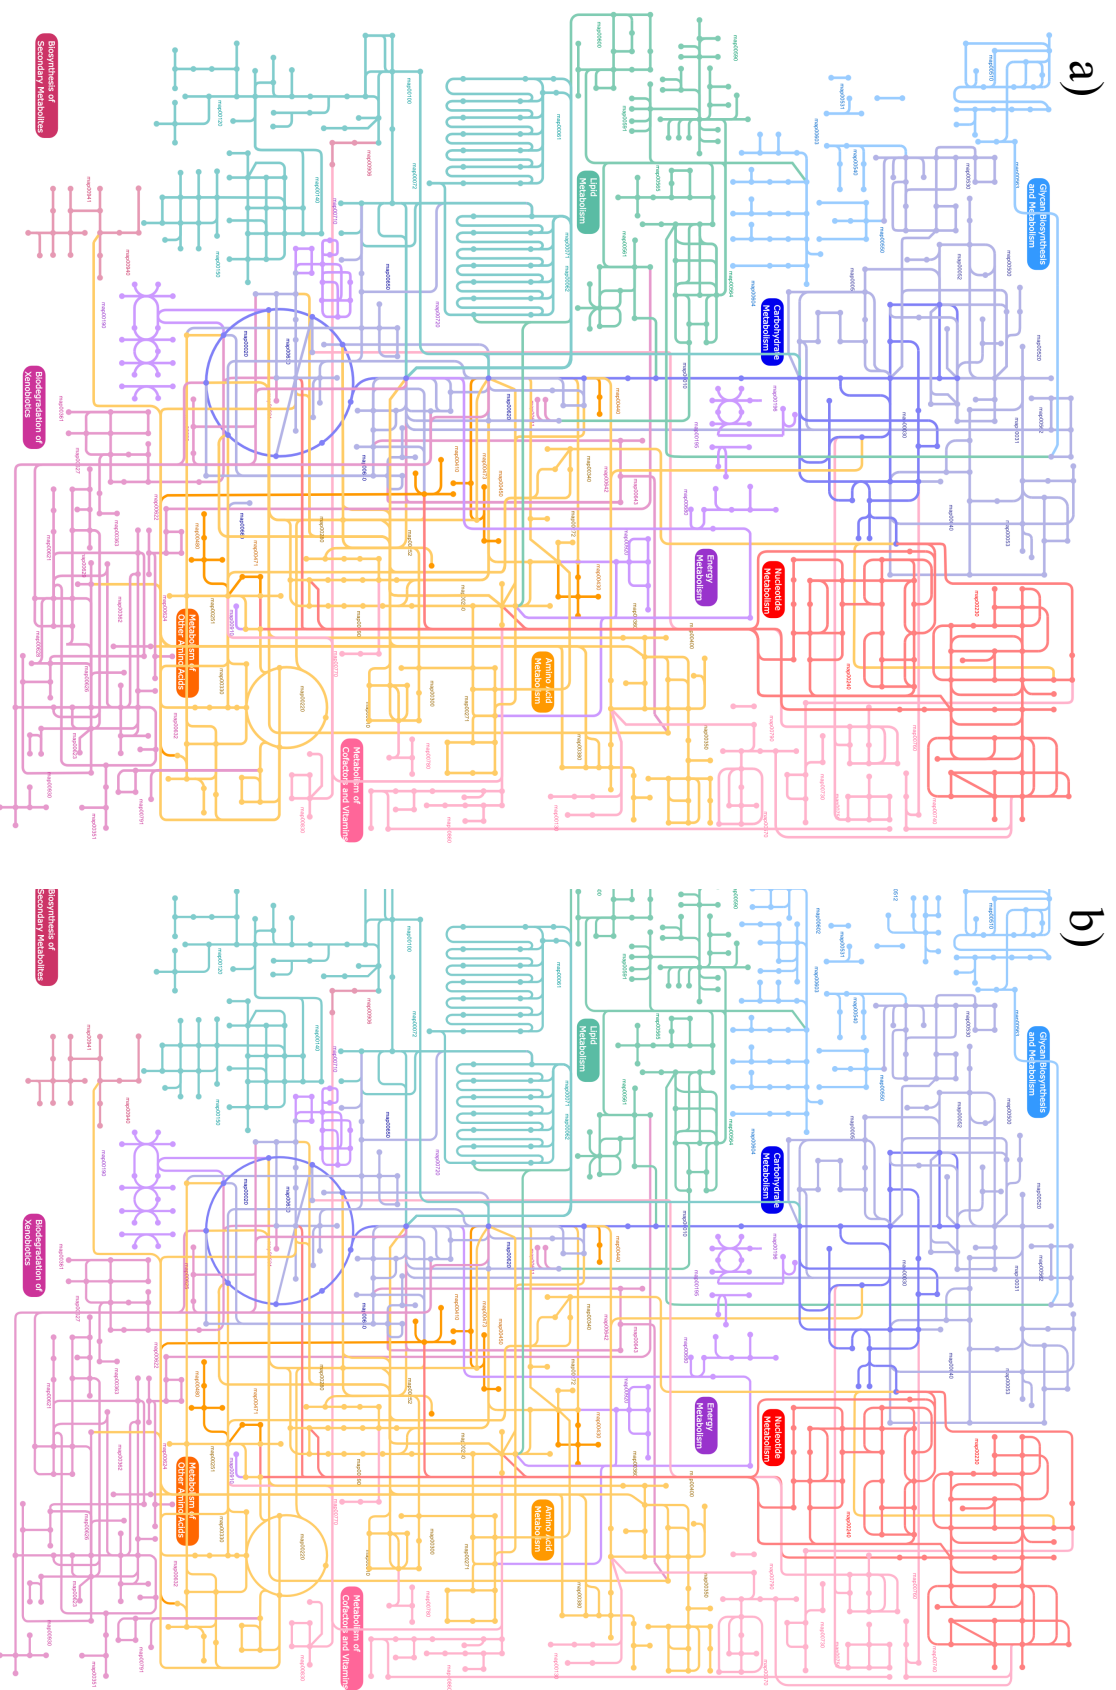

**Figure S1.** Graphic overview of the metabolism identified in the mats. Nodes represent compounds while edges represent enzymes. a) Pathways observed in Red mat; b) Pathways observed in Green mat. The underlying global pathways map is constructed using 123 KEGG pathways (Kanehisa 2008). This figure was made using iPath (Letunic 2008).
