# Supplementary material
Source: PubMed Central journal article supplement (PMC3426886)
Supplement: Supp_Table1.pdf [file Supp_Table1.pdf]

Supplementary material. **Table S1.**  
**Percentage of reads showing homology to genes associated with KEGG pathways**  
**(Full list).**

| KEGG pathway                                                                       | % Green<br>Mat <sup>a</sup> | % Red<br>Mat <sup>a</sup> |
|------------------------------------------------------------------------------------|-----------------------------|---------------------------|
| 10 Glycolysis / Gluconeogenesis [PATH:ko00010]                                     | 3.40                        | 3.31                      |
| 20 Citrate cycle (TCA cycle) [PATH:ko00020]                                        | 1.85 ± 0.017                | 1.58 ± 0.018              |
| 30 Pentose phosphate pathway [PATH:ko00030]                                        | 1.51 ± 0.015                | 1.24 ± 0.016              |
| 40 Pentose and glucuronate interconversions [PATH:ko00040]                         | 0.64                        | 0.55                      |
| 51 Fructose and mannose metabolism [PATH:ko00051]                                  | 1.87 ± 0.017                | 1.72 ± 0.019              |
| 52 Galactose metabolism [PATH:ko00052]                                             | 0.64                        | 0.61                      |
| 53 Ascorbate and aldarate metabolism [PATH:ko00053]                                | 0.15 ± 0.005                | 0.02 ± 0.002              |
| 61 Fatty acid biosynthesis [PATH:ko00061]                                          | 1.64 ± 0.016                | 1.11 ± 0.016              |
| 62 Fatty acid elongation in mitochondria [PATH:ko00062]                            | 0.23 ± 0.006                | 0.06 ± 0.004              |
| 71 Fatty acid metabolism [PATH:ko00071]                                            | 2.07 ± 0.018                | 0.91 ± 0.014              |
| 72 Synthesis and degradation of ketone bodies [PATH:ko00072]                       | 0.15                        | 0.11                      |
| 100 Steroid biosynthesis [PATH:ko00100]                                            | 0.04                        | 0.09                      |
| 120 Primary bile acid biosynthesis [PATH:ko00120]                                  | 0.09                        | 0.01                      |
| 130 Terpenoid-quinone biosynthesis [PATH:ko00130]                                  | 0.98 ± 0.013                | 0.66 ± 0.012              |
| 140 Steroid hormone biosynthesis [PATH:ko00140]                                    | 0.01 ± 0.001                | 0.12 ± 0.005              |
| 190 Oxidative phosphorylation [PATH:ko00190]                                       | 3.83                        | 3.89                      |
| 195 Photosynthesis [PATH:ko00195]                                                  | 0.21 ± 0.006                | 0.44 ± 0.010              |
| 196 Photosynthesis - antenna proteins [PATH:ko00196]                               | 0.09 ± 0.004                | 0.21 ± 0.007              |
| 230 Purine metabolism [PATH:ko00230]                                               | 6.43 ± 0.031                | 6.54 ± 0.036              |
| 232 Caffeine metabolism [PATH:ko00232]                                             | 0.01                        | NA                        |
| 240 Pyrimidine metabolism [PATH:ko00240]                                           | 2.07 ± 0.018                | 2.26 ± 0.022              |
| 250 Alanine, aspartate and glutamate metabolism [PATH:ko00250]                     | 2.30 ± 0.019                | 2.12 ± 0.021              |
| 260 Glycine, serine and threonine metabolism [PATH:ko00260]                        | 2.75 ± 0.021                | 1.83 ± 0.020              |
| 270 Cysteine and methionine metabolism [PATH:ko00270]                              | 1.97 ± 0.018                | 1.20 ± 0.016              |
| 280 Valine, leucine and isoleucine degradation [PATH:ko00280]                      | 1.37 ± 0.015                | 1.03 ± 0.015              |
| 281 Geraniol degradation [PATH:ko00281]                                            | 0.50 ± 0.009                | 0.15 ± 0.006              |
| 290 Valine, leucine and isoleucine biosynthesis [PATH:ko00290]                     | 1.52 ± 0.015                | 2.35 ± 0.022              |
| 300 Lysine biosynthesis [PATH:ko00300]                                             | 0.93                        | 0.96                      |
| 310 Lysine degradation [PATH:ko00310]                                              | 0.21                        | 0.17                      |
| 311 Penicillin and cephalosporin biosynthesis [PATH:ko00311]                       | 0.20                        | 0.13                      |
| 330 Arginine and proline metabolism [PATH:ko00330]                                 | 2.29 ± 0.019                | 1.10 ± 0.016              |
| 340 Histidine metabolism [PATH:ko00340]                                            | 1.04                        | 1.11                      |
| 350 Tyrosine metabolism [PATH:ko00350]                                             | 0.67 ± 0.010                | 0.19 ± 0.006              |
| 351 1,1,1-Trichloro-2,2-bis(4-chlorophenyl)ethane (DDT) degradation [PATH:ko00351] | 0.03                        | 0.01                      |
| 360 Phenylalanine metabolism [PATH:ko00360]                                        | 0.45 ± 0.008                | 0.21 ± 0.007              |
| 361 Chlorocyclohexane and chlorobenzene degradation [PATH:ko00361]                 | 0.40 ± 0.008                | 0.10 ± 0.005              |

|     |                                                                      |              |              |
|-----|----------------------------------------------------------------------|--------------|--------------|
| 362 | Benzoate degradation [PATH:ko00362]                                  | 0.43 ± 0.008 | 0.11 ± 0.005 |
| 363 | Bisphenol degradation [PATH:ko00363]                                 | 0.01         | 0.06         |
| 380 | Tryptophan metabolism [PATH:ko00380]                                 | 0.60 ± 0.010 | 0.31 ± 0.008 |
| 400 | Phenylalanine, tyrosine and tryptophan biosynthesis [PATH:ko00400]   | 1.33 ± 0.014 | 1.22 ± 0.016 |
| 410 | beta-Alanine metabolism [PATH:ko00410]                               | 0.16         | 0.11         |
| 430 | Taurine and hypotaurine metabolism [PATH:ko00430]                    | 0.32 ± 0.007 | 0.22 ± 0.007 |
| 440 | Phosphonate and phosphinate metabolism [PATH:ko00440]                | 0.14 ± 0.005 | 0.04 ± 0.003 |
| 450 | Selenocompound metabolism [PATH:ko00450]                             | 0.46         | 0.52         |
| 460 | Cyanoamino acid metabolism [PATH:ko00460]                            | 0.25         | 0.15         |
| 471 | D-Glutamine and D-glutamate metabolism [PATH:ko00471]                | 0.29 ± 0.007 | 0.44 ± 0.010 |
| 473 | D-Alanine metabolism [PATH:ko00473]                                  | 0.24 ± 0.006 | 0.37 ± 0.009 |
| 480 | Glutathione metabolism [PATH:ko00480]                                | 0.91 ± 0.012 | 0.48 ± 0.010 |
| 500 | Starch and sucrose metabolism [PATH:ko00500]                         | 1.39 ± 0.015 | 1.21 ± 0.016 |
| 510 | N-Glycan biosynthesis [PATH:ko00510]                                 | 0.13 ± 0.005 | 0.30 ± 0.008 |
| 511 | Other glycan degradation [PATH:ko00511]                              | 0.20         | 0.14         |
| 512 | Mucin type O-glycan biosynthesis [PATH:ko00512]                      | 0.00         | 0.00         |
| 514 | Other types of O-glycan biosynthesis [PATH:ko00514]                  | 0.02         | 0.01         |
| 520 | Amino sugar and nucleotide sugar metabolism [PATH:ko00520]           | 1.24         | 1.20         |
| 521 | Streptomycin biosynthesis [PATH:ko00521]                             | 0.93         | 0.89         |
| 531 | Glycosaminoglycan degradation [PATH:ko00531]                         | 0.07         | 0.04         |
| 540 | Lipopolysaccharide biosynthesis [PATH:ko00540]                       | 0.87 ± 0.012 | 1.03 ± 0.015 |
| 550 | Peptidoglycan biosynthesis [PATH:ko00550]                            | 1.17 ± 0.014 | 1.61 ± 0.019 |
| 561 | Glycerolipid metabolism [PATH:ko00561]                               | 0.55 ± 0.009 | 0.34 ± 0.009 |
| 562 | Inositol phosphate metabolism [PATH:ko00562]                         | 0.15 ± 0.005 | 0.05 ± 0.003 |
| 563 | Glycosylphosphatidylinositol(GPI)-anchor biosynthesis [PATH:ko00563] | 0.03         | 0.00         |
| 564 | Glycerophospholipid metabolism [PATH:ko00564]                        | 0.90 ± 0.012 | 0.43 ± 0.010 |
| 565 | Ether lipid metabolism [PATH:ko00565]                                | 0.04         | 0.01         |
| 590 | Arachidonic acid metabolism [PATH:ko00590]                           | 0.01         | 0.02         |
| 591 | Linoleic acid metabolism [PATH:ko00591]                              | 0.02         | 0.00         |
| 592 | alpha-Linolenic acid metabolism [PATH:ko00592]                       | 0.01         | NA           |
| 600 | Sphingolipid metabolism [PATH:ko00600]                               | 0.05         | 0.04         |
| 620 | Pyruvate metabolism [PATH:ko00620]                                   | 1.39 ± 0.015 | 1.03 ± 0.015 |
| 621 | Dioxin degradation [PATH:ko00621]                                    | 0.00         | 0.00         |
| 623 | Toluene degradation [PATH:ko00623]                                   | 0.15 ± 0.005 | 0.00 ± 0.001 |
| 625 | Chloroalkane and chloroalkene degradation [PATH:ko00625]             | 0.02         | 0.04         |
| 627 | Aminobenzoate degradation [PATH:ko00627]                             | 0.00         | 0.09         |
| 630 | Glyoxylate and dicarboxylate metabolism [PATH:ko00630]               | 1.23 ± 0.014 | 0.27 ± 0.008 |
| 633 | Nitrotoluene degradation [PATH:ko00633]                              | 0.09         | 0.06         |
| 640 | Propanoate metabolism [PATH:ko00640]                                 | 0.27 ± 0.007 | 0.14 ± 0.006 |
| 643 | Styrene degradation [PATH:ko00643]                                   | 0.01         | 0.01         |
| 650 | Butanoate metabolism [PATH:ko00650]                                  | 0.25 ± 0.006 | 0.09 ± 0.004 |
| 660 | C5-Branched dibasic acid metabolism [PATH:ko00660]                   | 0.02         | NA           |

|      |                                                                        |              |              |
|------|------------------------------------------------------------------------|--------------|--------------|
| 670  | One carbon pool by folate [PATH:ko00670]                               | 0.27 ± 0.007 | 0.49 ± 0.010 |
| 680  | Methane metabolism [PATH:ko00680]                                      | 0.28         | 0.27         |
| 710  | Carbon fixation in photosynthetic organisms [PATH:ko00710]             | 0.08         | 0.05         |
| 730  | Thiamine metabolism [PATH:ko00730]                                     | 0.94 ± 0.012 | 0.54 ± 0.011 |
| 740  | Riboflavin metabolism [PATH:ko00740]                                   | 0.56         | 0.53         |
| 750  | Vitamin B6 metabolism [PATH:ko00750]                                   | 0.38 ± 0.008 | 0.23 ± 0.007 |
| 760  | Nicotinate and nicotinamide metabolism [PATH:ko00760]                  | 1.00 ± 0.013 | 0.73 ± 0.013 |
| 770  | Pantothenate and CoA biosynthesis [PATH:ko00770]                       | 0.60 ± 0.010 | 0.46 ± 0.010 |
| 780  | Biotin metabolism [PATH:ko00780]                                       | 0.33         | 0.34         |
| 785  | Lipoic acid metabolism [PATH:ko00785]                                  | 0.16         | 0.18         |
| 790  | Folate biosynthesis [PATH:ko00790]                                     | 0.63 ± 0.010 | 0.40 ± 0.009 |
| 791  | Atrazine degradation [PATH:ko00791]                                    | 0.07         | 0.04         |
| 830  | Retinol metabolism [PATH:ko00830]                                      | 0.03         | 0.03         |
| 860  | Porphyrin and chlorophyll metabolism [PATH:ko00860]                    | 2.59 ± 0.020 | 2.34 ± 0.022 |
| 900  | Terpenoid backbone biosynthesis [PATH:ko00900]                         | 0.69 ± 0.011 | 0.97 ± 0.015 |
| 903  | Limonene and pinene degradation [PATH:ko00903]                         | 0.00         | 0.02         |
| 904  | Diterpenoid biosynthesis [PATH:ko00904]                                | 0.00         | 0.00         |
| 906  | Carotenoid biosynthesis [PATH:ko00906]                                 | 0.17         | 0.22         |
| 908  | Zeatin biosynthesis [PATH:ko00908]                                     | 0.08         | 0.11         |
| 910  | Nitrogen metabolism [PATH:ko00910]                                     | 1.03 ± 0.013 | 0.41 ± 0.010 |
| 920  | Sulfur metabolism [PATH:ko00920]                                       | 0.11         | 0.10         |
| 930  | Caprolactam degradation [PATH:ko00930]                                 | 0.07         | NA           |
| 940  | Phenylpropanoid biosynthesis [PATH:ko00940]                            | 0.02         | NA           |
| 941  | Flavonoid biosynthesis [PATH:ko00941]                                  | 0.05         | 0.04         |
| 944  | Flavone and flavonol biosynthesis [PATH:ko00944]                       | 0.00         | 0.00         |
| 950  | Isoquinoline alkaloid biosynthesis [PATH:ko00950]                      | 0.01         | 0.00         |
| 960  | Tropane, piperidine and pyridine alkaloid biosynthesis [PATH:ko00960]  | 0.04         | 0.04         |
| 970  | Aminoacyl-tRNA biosynthesis [PATH:ko00970]                             | 2.16 ± 0.018 | 4.34 ± 0.030 |
| 980  | Metabolism of xenobiotics by cytochrome P450 [PATH:ko00980]            | 0.05         | 0.00         |
| 982  | Drug metabolism - cytochrome P450 [PATH:ko00982]                       | 0.01         | NA           |
| 983  | Drug metabolism - other enzymes [PATH:ko00983]                         | 0.08         | 0.01         |
| 1040 | Biosynthesis of unsaturated fatty acids [PATH:ko01040]                 | 0.01         | 0.03         |
| 1053 | Biosynthesis of siderophore group nonribosomal peptides [PATH:ko01053] | 0.07         | 0.04         |
| 2010 | ABC transporters [PATH:ko02010]                                        | 8.83 ± 0.036 | 5.12 ± 0.032 |
| 2020 | Two-component system [PATH:ko02020]                                    | 4.59 ± 0.026 | 2.43 ± 0.023 |
| 2030 | Bacterial chemotaxis [PATH:ko02030]                                    | 1.27 ± 0.014 | 0.08 ± 0.004 |
| 2040 | Flagellar assembly [PATH:ko02040]                                      | 1.08 ± 0.013 | 0.31 ± 0.008 |
| 2060 | Phosphotransferase system (PTS) [PATH:ko02060]                         | 0.15         | 0.09         |
| 3008 | Ribosome biogenesis in eukaryotes [PATH:ko03008]                       | 0.00         | 0.09         |
| 3010 | Ribosome [PATH:ko03010]                                                | 1.81 ± 0.017 | 1.95 ± 0.021 |
| 3013 | RNA transport [PATH:ko03013]                                           | 0.00 ± 0.000 | 0.19 ± 0.006 |

|      |                                            |              |              |
|------|--------------------------------------------|--------------|--------------|
| 3018 | RNA degradation [PATH:ko03018]             | 1.03         | 1.10         |
| 3022 | Basal transcription factors [PATH:ko03022] | 0.02         | 0.01         |
| 3030 | DNA replication [PATH:ko03030]             | 0.69 ± 0.011 | 1.01 ± 0.015 |
| 3040 | Spliceosome [PATH:ko03040]                 | 0.02         | 0.02         |
| 3050 | Proteasome [PATH:ko03050]                  | 0.02         | 0.01         |
| 3060 | Protein export [PATH:ko03060]              | 1.26 ± 0.014 | 1.60 ± 0.019 |
| 3070 | Bacterial secretion system [PATH:ko03070]  | 0.90 ± 0.012 | 0.55 ± 0.011 |
| 3320 | PPAR signaling pathway [PATH:ko03320]      | 0.00         | 0.00         |
| 3410 | Base excision repair [PATH:ko03410]        | 0.80         | 0.72         |
| 3420 | Nucleotide excision repair [PATH:ko03420]  | 1.03 ± 0.013 | 2.43 ± 0.023 |
| 3430 | Mismatch repair [PATH:ko03430]             | 0.42 ± 0.008 | 0.94 ± 0.014 |
| 3440 | Homologous recombination [PATH:ko03440]    | 0.98 ± 0.013 | 1.50 ± 0.018 |
| 4010 | MAPK signaling pathway [PATH:ko04010]      | 0.07         | 0.01         |

<sup>a</sup> The given error is the standard error from False Discovery Rate analysis.
