# Supplementary material
Source: PubMed Central journal article supplement (PMC3426886)
Supplement: Supp_Table2.pdf [file Supp_Table2.pdf]

**Table S2.****PCA analysis of SEED Subsystems level 1 (Meyer *et al.*, 2008).****Correlation of each variable with factor 1**

|                               | <b>Correlation</b> | <b>P-value</b> |
|-------------------------------|--------------------|----------------|
| <b>Cluster system</b>         | 0.99922            | 2.95E-42       |
| <b>Cofactors and pigments</b> | 0.997675           | 2.18E-35       |
| <b>Miscellaneous</b>          | 0.997555           | 4.52E-35       |
| <b>Amino acids</b>            | 0.997344           | 1.50E-34       |
| <b>Carbohydrates</b>          | 0.996973           | 9.97E-34       |
| <b>Protein metabolism</b>     | 0.996624           | 4.83E-33       |
| <b>Cell division</b>          | 0.995114           | 1.02E-30       |
| <b>Cell wall</b>              | 0.995105           | 1.05E-30       |
| <b>Lipids</b>                 | 0.99492            | 1.79E-30       |
| <b>Nucleotides</b>            | 0.994764           | 2.77E-30       |
| <b>DNA metabolism</b>         | 0.994473           | 6.06E-30       |
| <b>RNA metabolism</b>         | 0.994238           | 1.11E-29       |
| <b>Respiration</b>            | 0.993927           | 2.37E-29       |
| <b>Stress response</b>        | 0.993802           | 3.18E-29       |
| <b>Transport</b>              | 0.993616           | 4.88E-29       |
| <b>Sulfur</b>                 | 0.992958           | 2.02E-28       |
| <b>Aromatic</b>               | 0.992208           | 8.69E-28       |
| <b>Nitrogen</b>               | 0.991532           | 2.89E-27       |
| <b>Secondary metabolism</b>   | 0.990146           | 2.58E-26       |
| <b>Virulence</b>              | 0.987861           | 5.24E-25       |
| <b>Cell signaling</b>         | 0.987054           | 1.33E-24       |
| <b>Spore</b>                  | 0.980752           | 4.00E-22       |
| <b>Motility</b>               | 0.97793            | 2.86E-21       |
| <b>Potassium</b>              | 0.977141           | 4.73E-21       |
| <b>Phosphorus</b>             | 0.97681            | 5.82E-21       |
| <b>Phages</b>                 | 0.969652           | 2.75E-19       |
| <b>Iron</b>                   | 0.969093           | 3.57E-19       |
| <b>Photosynthesis</b>         | 0.927324           | 6.60E-14       |
